# Supplementary material for: The deployment of a tissue request tracking system for the CHTN: a case study in managing change in informatics for biobanking operations
Source: Springer Nature journal article supplement (doi:10.1186/1472-6947-10-32), 2010-06-02

Coordinating Committee

Informatics Subcommittee

Informatics Team

Division Pathologists,  
domain experts for  
disease terminology

Division Coordinators,  
domain experts  
for user community

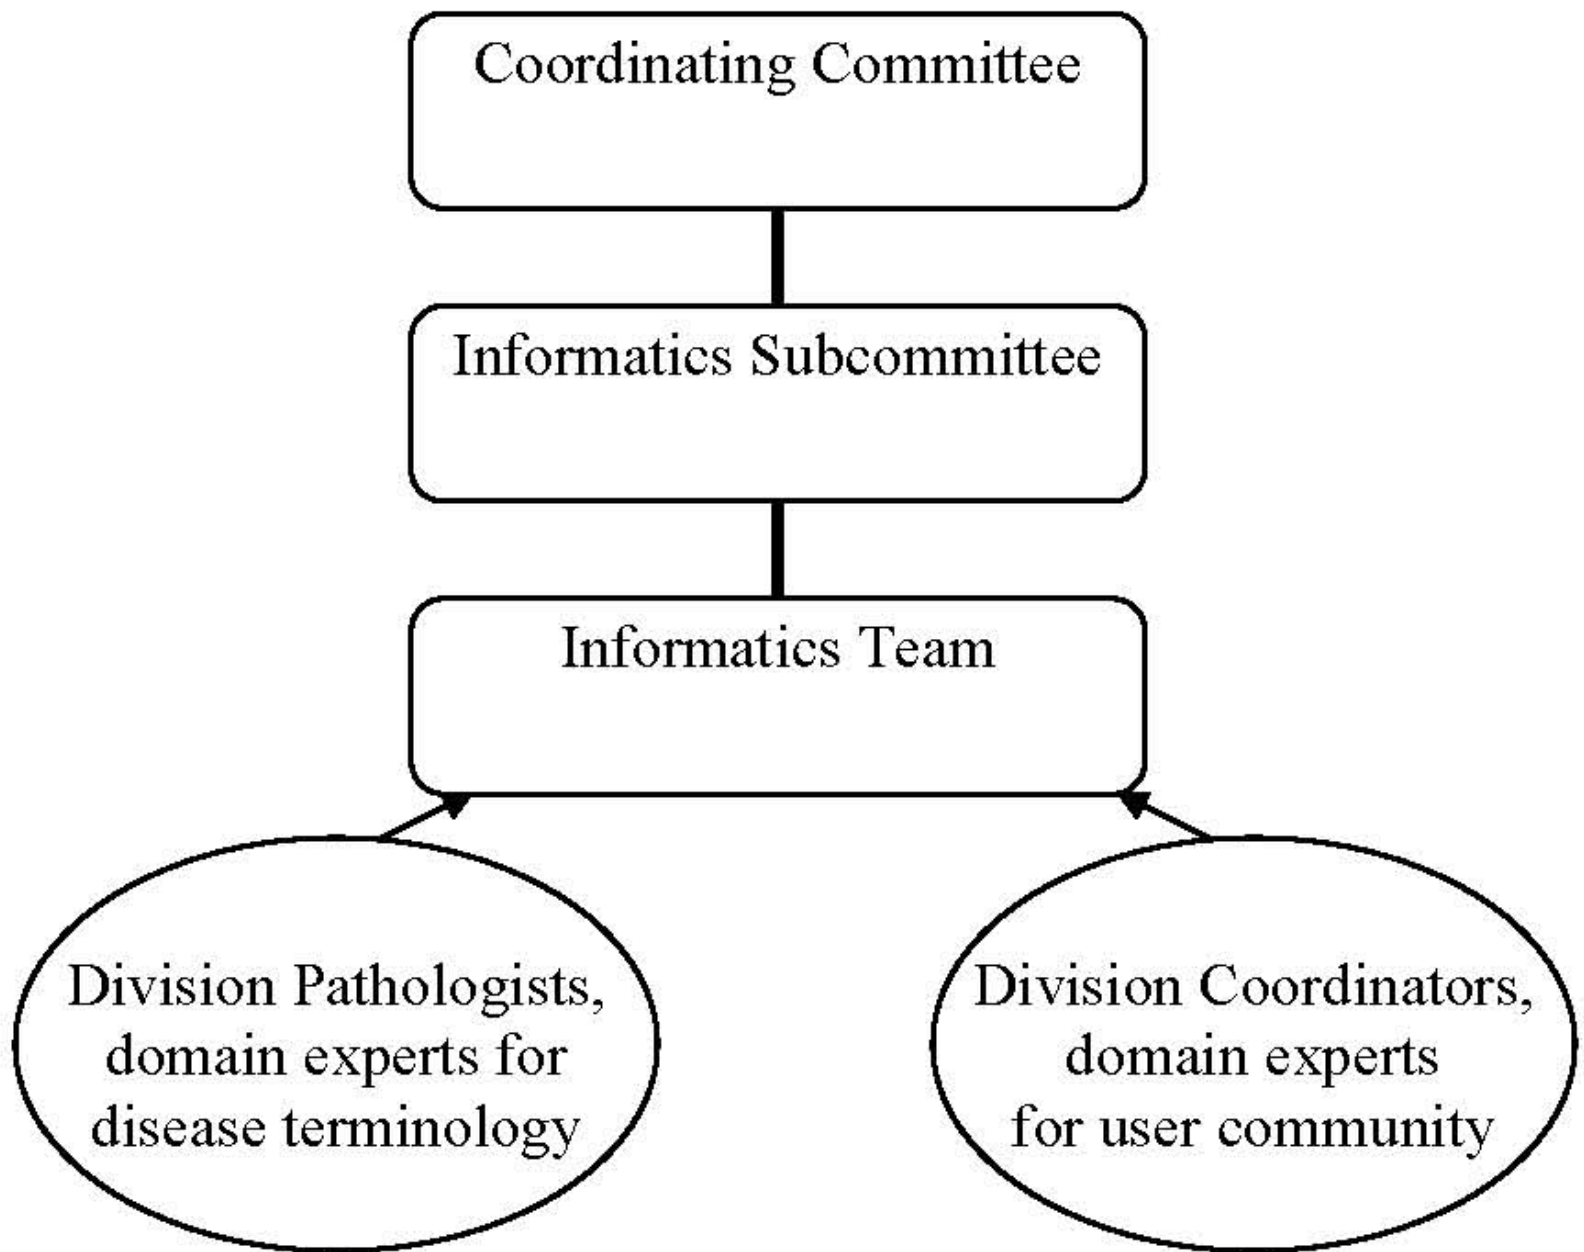

Supplement: 12911_2009_333_MOESM1_ESM.pdf [file 12911_2009_333_MOESM1_ESM.pdf]
